# Supplementary material
Source: ML conference proceedings conference paper supplement (https://openreview.net/forum?id=9KB7qc4ApB)
Supplement: supplementary_material [file attachment]

|   |   |   |   |   |   |   |   |
|---|---|---|---|---|---|---|---|
| 7 | 5 | 8 | 6 | 9 | 2 | 9 | 2 |
| 2 | 1 | 4 | 8 | 5 | 9 | 3 | 2 |
| 3 | 3 | 9 | 9 | 9 | 4 | 8 | 2 |
| 3 | 8 | 6 | 9 | 5 | 9 | 2 | 2 |
| 8 | 8 | 3 | 3 | 7 | 3 | 2 | 3 |
| 5 | 3 | 7 | 2 | 4 | 8 | 4 | 0 |
| 3 | 9 | 9 | 3 | 8 | 2 | 3 | 3 |
| 7 | 8 | 8 | 4 | 7 | 3 | 7 | 7 |
